# Supplementary material for: Chinese Dietary Indices and Glioma: New Insights of a Case–Control Study in the Chinese Population
Source: MDPI journal article supplement (doi:10.3390/nu15163602), 2023-08-17
Supplement: s1 [file s1]

## Supplementary Material

**Table S1.** Food items in the food frequency questionnaire.

**Table S2.** The intake of major food groups in China in case group, control group, and national representative population in China.

**Table S3.** Correlations between Chinese dietary indices among the case-control participants.

**Table S4.** Sensitivity analysis of Chinese dietary indices and glioma.

**Table S5.** Chinese dietary indices influenced the proportion of gliomas mediated by BMI.

**Figure S1.** The flow chart of the case control population matching.

**Table S1.** Food items in the food frequency questionnaire.

| Food group (n)          | Items                                                                                                                                                                                                                                               |
|-------------------------|-----------------------------------------------------------------------------------------------------------------------------------------------------------------------------------------------------------------------------------------------------|
| Refined grains (9)      | Rice, steamed buns, scones, porridge, deep-fried dough sticks, noodles, instant noodles, vermicelli, dumplings                                                                                                                                      |
| Whole grains (2)        | Corn, millet and oats                                                                                                                                                                                                                               |
| Tubers (2)              | Potatoes, sweet potatoes                                                                                                                                                                                                                            |
| Legume and Products (5) | Soy, soy milk, tofu, other soy products, other legumes                                                                                                                                                                                              |
| Vegetables (23)         | Green leafy vegetables, kale, cabbage, celery, eggplant, cucumber, white gourd, pumpkin, carrot, radish, green shoot, broccoli, bell pepper, pepper, tomato, lotus root, chive, garlic moss, bitter melon, onion, green bean, zucchini, cauliflower |
| Fungi and algae (4)     | Mushrooms, Auricularia auricula, tremella, kelp                                                                                                                                                                                                     |
| Fruits (20)             | Apple, pear, orange, banana, peach, watermelon, melon, grape, pineapple, kiwi fruit, strawberries, cherries, blueberries, mulberries, shaddock, hawthorn, pitaya, Chinese date, mango, cherry tomato                                                |
| Red meat (4)            | Pork (muscle), pork (fat & muscle), beef, mutton                                                                                                                                                                                                    |
| Poultry (2)             | Chicken, duck                                                                                                                                                                                                                                       |
| Animal offal (4)        | Liver, blood, intestine, other viscera                                                                                                                                                                                                              |
| Fish and seafood (5)    | Freshwater fish, sea fish, shrimp, crab, mollusk                                                                                                                                                                                                    |
| Egg (1)                 | Fresh egg                                                                                                                                                                                                                                           |
| Dairy products (4)      | Milk, yogurt, milk powder, cheese                                                                                                                                                                                                                   |
| Nuts (4)                | Peanuts, sunflower seeds, walnuts, other nuts                                                                                                                                                                                                       |
| Sweet food (5)          | Bread, honey, biscuit, cake, Chinese pastry                                                                                                                                                                                                         |
| Sugary drink (3)        | Carbonated drinks, fruit and vegetable drinks, functional drinks                                                                                                                                                                                    |
| Tea and coffee (3)      | Green tea, black tea, coffee                                                                                                                                                                                                                        |
| Condiment (4)           | Salt, animal oil, olive oil, other vegetable oil                                                                                                                                                                                                    |
| Curing food (3)         | Sauerkraut, pickle, fermented bean curd                                                                                                                                                                                                             |
| Processed products (3)  | Bacon, sausage and other smoked meat, salted duck eggs, preserved eggs                                                                                                                                                                              |
| Alcohol (4)             | Beer, spirit, wine, rice wine                                                                                                                                                                                                                       |

**Table S2.** The intake of major food groups in China in case group, control group, and national representative population in China.

| Food group                 | Case          | Control       | Representative data 1 <sup>a</sup> | Representative data 2 <sup>b</sup> |
|----------------------------|---------------|---------------|------------------------------------|------------------------------------|
| Grains and products(g/d)   | 231.61±106.64 | 193.32±105.31 | 320.5                              | 263.9                              |
| Tubers(g/d)                | 28.20±43.42   | 46.43±58.95   | 35.8                               | 35.5                               |
| Legume and products(g/d)   | 8.78±10.43    | 15.02±19.63   | 15.2                               | 15.6                               |
| Vegetables(g/d)            | 219.08±155.89 | 409.05±245.67 | 269.4                              | 286.5                              |
| Fruits(g/d)                | 167.10±152.56 | 249.70±191.21 | 40.7                               | 55.7                               |
| Red meat and products(g/d) | 65.85±55.95   | 65.18±52.75   | 82.5                               | -                                  |
| Animal offal               | 2.64±13.10    | 4.32±8.68     | 2.5                                | -                                  |
| Poultry(g/d)               | 14.76±18.94   | 14.45±19.89   | 14.7                               | -                                  |
| Red meat and poultry(g/d)  | 80.61±64.58   | 79.63±61.16   | -                                  | 98.0                               |
| Egg(g/d)                   | 51.10±34.96   | 48.54±34.79   | 24.3                               | 30.4                               |
| Fish and seafood (g/d)     | 14.04±22.56   | 24.45±33.66   | 23.7                               | 29.7                               |
| Nuts(g/d)                  | 10.85±21.17   | 9.95±15.33    | 3.81                               | 4.7                                |

a. Representative data 1 sourced from the 2015 Report on Nutrition and Chronic Disease Status of Chinese Residents [1].

b. Representative data 2 sourced from Chinese Center for Disease Control and Prevention [2].

#### References

1. Gu, J.F. Interpretation of the Report on Nutrition and Chronic Disease Status of Chinese Residents (2015). *Acta Nutrimenta Sinica*. **2016**, 38, 525-529., doi: 10.13325/j.cnki.acta.nutr.sin.2016.06.004.
2. Chinese Center for Disease Control and Prevention. [https://www.chinanutri.cn/sjnj/swsryssjg/zgjmswsl/zgjmglswpjsrl/201512/t20151230\\_123992.html](https://www.chinanutri.cn/sjnj/swsryssjg/zgjmswsl/zgjmglswpjsrl/201512/t20151230_123992.html) (Accessed on July 24, 2023).

**Table S3.** Correlations between Chinese dietary indices among the case-control participants.

|             | CHEI    | LBS<br>of<br>CDQI | HBS<br>of<br>CDQI | DQD<br>of<br>CDQI | LBS<br>of<br>CDBI | HBS<br>of<br>CDBI | DQD<br>of<br>CDBI | DAI     | DII     |
|-------------|---------|-------------------|-------------------|-------------------|-------------------|-------------------|-------------------|---------|---------|
| CHEI        | 1.000   | 0.306*            | -0.122*           | -0.312*           | 0.793*            | -0.446*           | -0.821*           | 0.401*  | -0.675* |
| LBS of CDQI | 0.306*  | 1.000             | 0.250*            | -0.418*           | 0.350*            | -0.159*           | -0.364*           | 0.706*  | -0.532* |
| HBS of CDQI | -0.122* | 0.250*            | 1.000             | 0.737*            | 0.050             | 0.227*            | 0.048             | 0.156*  | 0.003   |
| DQD of CDQI | -0.312* | -0.418*           | 0.737*            | 1.000             | -0.189*           | 0.298*            | 0.284*            | -0.331* | 0.362*  |
| LBS of CDBI | 0.793*  | 0.350*            | 0.050             | -0.189*           | 1.000             | -0.271*           | -0.906*           | 0.410*  | -0.617* |
| HBS of CDBI | -0.446* | -0.159*           | 0.227*            | 0.298*            | -0.271*           | 1.000             | 0.627*            | -0.174* | 0.317*  |
| DQD of CDBI | -0.821* | -0.364*           | 0.048             | 0.284*            | -0.906*           | 0.627*            | 1.000             | -0.419* | 0.636*  |
| DAI         | 0.401*  | 0.706*            | 0.156*            | -0.331*           | 0.410*            | -0.174*           | -0.419*           | 1.000   | -0.861* |
| DII         | -0.675* | -0.532*           | 0.003             | 0.362*            | -0.617*           | 0.317*            | 0.636*            | -0.861* | 1.000   |

\* $P < 0.001$ .

**Table S4.** Sensitivity analysis of Chinese dietary indices and glioma.

| <b>Group <sup>a</sup></b> | <b>Model 1 <sup>b</sup></b> | <b><i>P</i></b>  | <b>Model 2 <sup>c</sup></b> | <b><i>P</i></b>  |
|---------------------------|-----------------------------|------------------|-----------------------------|------------------|
| <b>Age</b>                |                             |                  |                             |                  |
| <b>≤40(n=500)</b>         |                             |                  |                             |                  |
| CHEI                      | <b>0.95(0.93-0.97)</b>      | <b>&lt;0.001</b> | <b>0.94(0.92-0.96)</b>      | <b>&lt;0.001</b> |
| DAI                       | 0.97(0.93-1.01)             | 0.117            | <b>0.63(0.55-0.72)</b>      | <b>&lt;0.001</b> |
| LBS of CDQI               | 0.99(0.97-1.02)             | 0.577            | 1.01(0.97-1.04)             | 0.682            |
| HBS of CDQI               | <b>1.03(1.01-1.05)</b>      | <b>0.001</b>     | 1.02(0.99-1.04)             | 0.114            |
| DQD of CDQI               | <b>1.02(1.01-1.04)</b>      | <b>0.005</b>     | 1.02(0.99-1.04)             | 0.077            |
| LBS of CDBI               | <b>1.04(1.02-1.06)</b>      | <b>&lt;0.001</b> | <b>1.05(1.03-1.08)</b>      | <b>&lt;0.001</b> |
| HBS of CDBI               | <b>1.10(1.06-1.14)</b>      | <b>&lt;0.001</b> | <b>1.08(1.03-1.13)</b>      | <b>0.001</b>     |
| DQD of CDBI               | <b>1.04(1.03-1.06)</b>      | <b>&lt;0.001</b> | <b>1.05(1.03-1.08)</b>      | <b>&lt;0.001</b> |
| DII                       | <b>1.25(1.14-1.37)</b>      | <b>&lt;0.001</b> | <b>1.91(1.60-2.26)</b>      | <b>&lt;0.001</b> |
| <b>&gt;41(n=512)</b>      |                             |                  |                             |                  |
| CHEI                      | <b>0.91(0.89-0.93)</b>      | <b>&lt;0.001</b> | <b>0.89(0.86-0.91)</b>      | <b>&lt;0.001</b> |
| DAI                       | <b>0.91(0.87-0.95)</b>      | <b>&lt;0.001</b> | <b>0.65(0.58-0.73)</b>      | <b>&lt;0.001</b> |
| LBS of CDQI               | 1.01(0.99-1.03)             | 0.326            | 1.01(0.98-1.05)             | 0.575            |
| HBS of CDQI               | <b>1.03(1.02-1.05)</b>      | <b>&lt;0.001</b> | <b>1.04(1.02-1.06)</b>      | <b>&lt;0.001</b> |
| DQD of CDQI               | <b>1.04(1.02-1.05)</b>      | <b>&lt;0.001</b> | <b>1.04(1.02-1.06)</b>      | <b>&lt;0.001</b> |
| LBS of CDBI               | <b>1.07(1.05-1.10)</b>      | <b>&lt;0.001</b> | <b>1.09(1.06-1.12)</b>      | <b>&lt;0.001</b> |
| HBS of CDBI               | <b>1.13(1.08-1.17)</b>      | <b>&lt;0.001</b> | <b>1.09(1.05-1.14)</b>      | <b>&lt;0.001</b> |
| DQD of CDBI               | <b>1.07(1.05-1.09)</b>      | <b>&lt;0.001</b> | <b>1.08(1.05-1.10)</b>      | <b>&lt;0.001</b> |
| DII                       | <b>1.51(1.38-1.66)</b>      | <b>&lt;0.001</b> | <b>2.12(1.80-2.49)</b>      | <b>&lt;0.001</b> |
| <b>Sex</b>                |                             |                  |                             |                  |
| <b>Male(n=568)</b>        |                             |                  |                             |                  |
| CHEI                      | <b>0.94(0.92-0.95)</b>      | <b>&lt;0.001</b> | <b>0.92(0.90-0.94)</b>      | <b>&lt;0.001</b> |
| DAI                       | <b>0.96(0.92-0.99)</b>      | <b>0.010</b>     | <b>0.63(0.56-0.70)</b>      | <b>&lt;0.001</b> |
| LBS of CDQI               | 0.99(0.97-1.01)             | 0.203            | 1.01(0.98-1.04)             | 0.581            |
| HBS of CDQI               | <b>1.03(1.02-1.05)</b>      | <b>&lt;0.001</b> | <b>1.02(1.01-1.04)</b>      | <b>0.013</b>     |
| DQD of CDQI               | <b>1.02(1.01-1.04)</b>      | <b>0.004</b>     | <b>1.02(1.01-1.04)</b>      | <b>0.007</b>     |
| LBS of CDBI               | <b>1.04(1.02-1.05)</b>      | <b>&lt;0.001</b> | <b>1.06(1.04-1.08)</b>      | <b>&lt;0.001</b> |
| HBS of CDBI               | <b>1.10(1.06-1.14)</b>      | <b>&lt;0.001</b> | <b>1.09(1.05-1.14)</b>      | <b>&lt;0.001</b> |
| DQD of CDBI               | <b>1.04(1.03-1.06)</b>      | <b>&lt;0.001</b> | <b>1.06(1.04-1.08)</b>      | <b>&lt;0.001</b> |
| DII                       | <b>1.28(1.19-1.39)</b>      | <b>&lt;0.001</b> | <b>1.90(1.65-2.19)</b>      | <b>&lt;0.001</b> |
| <b>Female(n=444)</b>      |                             |                  |                             |                  |
| CHEI                      | <b>0.90(0.88-0.93)</b>      | <b>&lt;0.001</b> | <b>0.90(0.87-0.93)</b>      | <b>&lt;0.001</b> |
| DAI                       | <b>0.91(0.87-0.96)</b>      | <b>&lt;0.001</b> | <b>0.68(0.59-0.78)</b>      | <b>&lt;0.001</b> |
| LBS of CDQI               | <b>1.03(1.00-1.05)</b>      | <b>0.038</b>     | 1.00(0.96-1.05)             | 0.880            |
| HBS of CDQI               | <b>1.03(1.02-1.05)</b>      | <b>&lt;0.001</b> | <b>1.03(1.01-1.06)</b>      | <b>0.004</b>     |
| DQD of CDQI               | <b>1.04(1.02-1.06)</b>      | <b>&lt;0.001</b> | <b>1.03(1.01-1.06)</b>      | <b>0.004</b>     |
| LBS of CDBI               | <b>1.10(1.07-1.13)</b>      | <b>&lt;0.001</b> | <b>1.10(1.06-1.14)</b>      | <b>&lt;0.001</b> |
| HBS of CDBI               | <b>1.13(1.08-1.17)</b>      | <b>&lt;0.001</b> | <b>1.09(1.03-1.14)</b>      | <b>0.002</b>     |
| DQD of CDBI               | <b>1.09(1.06-1.11)</b>      | <b>&lt;0.001</b> | <b>1.09(1.06-1.12)</b>      | <b>&lt;0.001</b> |
| DII                       | <b>1.50(1.35-1.66)</b>      | <b>&lt;0.001</b> | <b>2.24(1.80-2.77)</b>      | <b>&lt;0.001</b> |

|                                    |                 |        |                 |        |
|------------------------------------|-----------------|--------|-----------------|--------|
| <b>BMI</b>                         |                 |        |                 |        |
| <b>≤23.31(n=506)</b>               |                 |        |                 |        |
| CHEI                               | 0.94(0.92-0.95) | <0.001 | 0.93(0.91-0.95) | <0.001 |
| DAI                                | 0.93(0.90-0.97) | 0.001  | 0.70(0.61-0.80) | <0.001 |
| LBS of CDQI                        | 1.02(0.99-1.04) | 0.100  | 1.01(0.98-1.05) | 0.525  |
| HBS of CDQI                        | 1.03(1.01-1.04) | 0.001  | 1.03(1.01-1.05) | 0.013  |
| DQD of CDQI                        | 1.03(1.02-1.05) | <0.001 | 1.03(1.01-1.05) | 0.005  |
| LBS of CDBI                        | 1.04(1.02-1.06) | <0.001 | 1.05(1.03-1.08) | <0.001 |
| HBS of CDBI                        | 1.12(1.08-1.17) | <0.001 | 1.09(1.04-1.14) | <0.001 |
| DQD of CDBI                        | 1.05(1.04-1.07) | <0.001 | 1.05(1.03-1.08) | <0.001 |
| DII                                | 1.32(1.21-1.44) | <0.001 | 1.79(1.52-2.11) | <0.001 |
| <b>&gt;23.31(n=506)</b>            |                 |        |                 |        |
| CHEI                               | 0.92(0.90-0.94) | <0.001 | 0.91(0.88-0.93) | <0.001 |
| DAI                                | 0.93(0.90-0.97) | 0.001  | 0.61(0.54-0.69) | <0.001 |
| LBS of CDQI                        | 0.99(0.97-1.01) | 0.336  | 1.00(0.96-1.03) | 0.907  |
| HBS of CDQI                        | 1.03(1.02-1.05) | <0.001 | 1.03(1.01-1.05) | 0.004  |
| DQD of CDQI                        | 1.03(1.01-1.04) | 0.001  | 1.03(1.01-1.05) | 0.005  |
| LBS of CDBI                        | 1.07(1.05-1.09) | <0.001 | 1.08(1.06-1.11) | <0.001 |
| HBS of CDBI                        | 1.10(1.06-1.14) | <0.001 | 1.09(1.05-1.14) | <0.001 |
| DQD of CDBI                        | 1.06(1.04-1.08) | <0.001 | 1.07(1.05-1.10) | <0.001 |
| DII                                | 1.44(1.31-1.59) | <0.001 | 2.21(1.86-2.62) | <0.001 |
| <b>Education level</b>             |                 |        |                 |        |
| <b>University and above(n=627)</b> |                 |        |                 |        |
| CHEI                               | 0.94(0.92-0.95) | <0.001 | 0.93(0.91-0.94) | <0.001 |
| DAI                                | 0.96(0.92-0.99) | 0.014  | 0.67(0.60-0.74) | <0.001 |
| LBS of CDQI                        | 0.99(0.97-1.01) | 0.389  | 1.00(0.97-1.03) | 0.944  |
| HBS of CDQI                        | 1.04(1.02-1.05) | <0.001 | 1.03(1.01-1.05) | 0.001  |
| DQD of CDQI                        | 1.03(1.01-1.04) | <0.001 | 1.03(1.01-1.05) | 0.001  |
| LBS of CDBI                        | 1.04(1.02-1.06) | <0.001 | 1.06(1.03-1.08) | <0.001 |
| HBS of CDBI                        | 1.11(1.07-1.15) | <0.001 | 1.09(1.05-1.13) | <0.001 |
| DQD of CDBI                        | 1.05(1.03-1.06) | <0.001 | 1.06(1.04-1.08) | <0.001 |
| DII                                | 1.30(1.20-1.41) | <0.001 | 1.89(1.64-2.18) | <0.001 |
| <b>Household income</b>            |                 |        |                 |        |
| <b>&gt;3,000 ¥/month(n=871)</b>    |                 |        |                 |        |
| CHEI                               | 0.92(0.91-0.94) | <0.001 | 0.92(0.90-0.93) | <0.001 |
| DAI                                | 0.93(0.90-0.96) | <0.001 | 0.65(0.59-0.71) | <0.001 |
| LBS of CDQI                        | 1.01(0.99-1.03) | 0.265  | 1.01(0.99-1.04) | 0.339  |
| HBS of CDQI                        | 1.03(1.02-1.04) | <0.001 | 1.03(1.02-1.05) | <0.001 |
| DQD of CDQI                        | 1.03(1.02-1.04) | <0.001 | 1.03(1.02-1.05) | <0.001 |
| LBS of CDBI                        | 1.07(1.05-1.09) | <0.001 | 1.07(1.05-1.10) | <0.001 |
| HBS of CDBI                        | 1.12(1.09-1.15) | <0.001 | 1.10(1.06-1.14) | <0.001 |

|                          |                        |                   |                        |                   |
|--------------------------|------------------------|-------------------|------------------------|-------------------|
| DQD of CDBI              | <b>1.07(1.05-1.08)</b> | <b>&lt;0.001</b>  | <b>1.07(1.05-1.09)</b> | <b>&lt;0.001</b>  |
| DII                      | <b>1.42(1.32-1.52)</b> | <b>&lt;0.001</b>  | <b>1.97(1.74-2.22)</b> | <b>&lt;0.001</b>  |
| <b>Smoking status</b>    |                        |                   |                        |                   |
| <b>Never</b>             |                        |                   |                        |                   |
| <b>smoking(n=735)</b>    |                        |                   |                        |                   |
| CHEI                     | <b>0.93(0.92-0.95)</b> | <b>&lt; 0.001</b> | <b>0.93(0.92-0.95)</b> | <b>&lt; 0.001</b> |
| DAI                      | <b>0.94(0.90-0.97)</b> | <b>&lt; 0.001</b> | <b>0.69(0.63-0.77)</b> | <b>&lt; 0.001</b> |
| LBS of CDQI              | 1.01(0.99-1.03)        | 0.399             | 1.00(0.97-1.03)        | 0.993             |
| HBS of CDQI              | <b>1.03(1.02-1.05)</b> | <b>&lt; 0.001</b> | <b>1.03(1.01-1.05)</b> | <b>&lt; 0.001</b> |
| DQD of CDQI              | <b>1.03(1.02-1.05)</b> | <b>&lt; 0.001</b> | <b>1.03(1.01-1.04)</b> | <b>0.001</b>      |
| LBS of CDBI              | <b>1.05(1.03-1.07)</b> | <b>&lt; 0.001</b> | <b>1.05(1.03-1.07)</b> | <b>&lt; 0.001</b> |
| HBS of CDBI              | <b>1.13(1.09-1.16)</b> | <b>&lt; 0.001</b> | <b>1.09(1.05-1.13)</b> | <b>&lt; 0.001</b> |
| DQD of CDBI              | <b>1.06(1.04-1.07)</b> | <b>&lt; 0.001</b> | <b>1.05(1.03-1.07)</b> | <b>&lt; 0.001</b> |
| DII                      | <b>1.35(1.26-1.46)</b> | <b>&lt; 0.001</b> | <b>1.82(1.60-2.08)</b> | <b>&lt; 0.001</b> |
| <b>History of</b>        |                        |                   |                        |                   |
| <b>allergies</b>         |                        |                   |                        |                   |
| <b>No(n=899)</b>         |                        |                   |                        |                   |
| CHEI                     | <b>0.93(0.92-0.94)</b> | <b>&lt;0.001</b>  | <b>0.92(0.90-0.93)</b> | <b>&lt;0.001</b>  |
| DAI                      | <b>0.93(0.90-0.96)</b> | <b>&lt;0.001</b>  | <b>0.64(0.58-0.70)</b> | <b>&lt;0.001</b>  |
| LBS of CDQI              | 1.00(0.99-1.02)        | 0.637             | 1.01(0.98-1.04)        | 0.471             |
| HBS of CDQI              | <b>1.03(1.02-1.04)</b> | <b>&lt;0.001</b>  | <b>1.02(1.01-1.04)</b> | <b>0.001</b>      |
| DQD of CDQI              | <b>1.03(1.02-1.04)</b> | <b>&lt;0.001</b>  | <b>1.03(1.01-1.04)</b> | <b>&lt;0.001</b>  |
| LBS of CDBI              | <b>1.06(1.04-1.08)</b> | <b>&lt; 0.001</b> | <b>1.08(1.06-1.10)</b> | <b>&lt; 0.001</b> |
| HBS of CDBI              | <b>1.12(1.08-1.15)</b> | <b>&lt;0.001</b>  | <b>1.09(1.06-1.13)</b> | <b>&lt;0.001</b>  |
| DQD of CDBI              | <b>1.06(1.05-1.07)</b> | <b>&lt;0.001</b>  | <b>1.07(1.05-1.09)</b> | <b>&lt;0.001</b>  |
| DII                      | <b>1.38(1.29-1.47)</b> | <b>&lt;0.001</b>  | <b>1.95(1.73-2.20)</b> | <b>&lt;0.001</b>  |
| <b>Family history of</b> |                        |                   |                        |                   |
| <b>cancer</b>            |                        |                   |                        |                   |
| <b>No(n=753)</b>         |                        |                   |                        |                   |
| CHEI                     | <b>0.93(0.92-0.94)</b> | <b>&lt;0.001</b>  | <b>0.92(0.91-0.94)</b> | <b>&lt;0.001</b>  |
| DAI                      | <b>0.93(0.90-0.96)</b> | <b>&lt;0.001</b>  | <b>0.64(0.58-0.71)</b> | <b>&lt;0.001</b>  |
| LBS of CDQI              | 1.00(0.99-1.02)        | 0.719             | 1.01(0.98-1.04)        | 0.600             |
| HBS of CDQI              | <b>1.03(1.02-1.05)</b> | <b>&lt;0.001</b>  | <b>1.02(1.01-1.04)</b> | <b>0.005</b>      |
| DQD of CDQI              | <b>1.03(1.02-1.05)</b> | <b>&lt;0.001</b>  | <b>1.02(1.01-1.04)</b> | <b>0.002</b>      |
| LBS of CDBI              | <b>1.05(1.04-1.07)</b> | <b>&lt; 0.001</b> | <b>1.07(1.05-1.09)</b> | <b>&lt; 0.001</b> |
| HBS of CDBI              | <b>1.13(1.09-1.17)</b> | <b>&lt;0.001</b>  | <b>1.11(1.07-1.15)</b> | <b>&lt;0.001</b>  |
| DQD of CDBI              | <b>1.06(1.05-1.07)</b> | <b>&lt;0.001</b>  | <b>1.07(1.05-1.09)</b> | <b>&lt;0.001</b>  |
| DII                      | <b>1.38(1.28-1.48)</b> | <b>&lt;0.001</b>  | <b>1.99(1.74-2.27)</b> | <b>&lt;0.001</b>  |

Note: These results represented the result of each 1-point changed in dietary index. Bold results indicate significance. Abbreviation: CDQI, Chinese Dietary Quality Index; CDBI, Chinese Dietary Balance Index; CHEI, Chinese Healthy Eating Index; DAI, Dietary antioxidant index; DII, Dietary inflammation index; DQD, dietary quality distance; HBS, high bound score; LBS, low bound score.

<sup>a</sup>. Unconditional logistic regression model was used for sensitivity analysis.

<sup>b</sup>. Model 1: Unadjusted model.

<sup>c</sup>. Model 2: Adjusted for age, BMI, occupation, education level, household income, high-risk residential areas, smoking status, history of allergies, history of head trauma, family history of cancer, physical activity, and energy intake (except for corresponding hierarchical variables).

**Table S5.** Chinese dietary indices influenced the proportion of gliomas mediated by BMI.

| Dietary index <sup>a</sup> | Total effect        | ADE                 | ACME                 | Proportion mediated (%) |
|----------------------------|---------------------|---------------------|----------------------|-------------------------|
| CHEI                       | -0.16(-0.17, -0.14) | -0.15(-0.16, -0.14) | -0.003(-0.007, 0.00) | 2.18                    |
| <i>P</i>                   | <0.001              | <0.001              | 0.010                | 0.010                   |
| LBS of CDQI                | -0.05(-0.09, -0.01) | -0.05(-0.09, 0)     | -0.003(-0.008, 0)    | 5.27                    |
| <i>P</i>                   | 0.024               | 0.036               | 0.354                | 0.366                   |
| HBS of CDQI                | 0.08(0.05, 0.11)    | 0.08(0.05, 0.11)    | 0.002(-0.001, 0.01)  | 2.68                    |
| <i>P</i>                   | <0.001              | <0.001              | 0.300                | 0.300                   |
| DQD of CDQI                | 0.07(0.04, 0.10)    | 0.07(0.04, 0.10)    | 0.002(-0.001, 0.01)  | 3.17                    |
| <i>P</i>                   | <0.001              | <0.001              | 0.210                | 0.210                   |
| LBS of CDBI                | -0.13(-0.15, -0.10) | -0.13(-0.15, -0.10) | -0.003(-0.008, 0)    | 2.54                    |
| <i>P</i>                   | <0.001              | <0.001              | 0.074                | 0.074                   |
| HBS of CDBI                | 0.11(0.08, 0.13)    | 0.11(0.08, 0.13)    | 0.003(-0.001, 0.01)  | 2.63                    |
| <i>P</i>                   | <0.001              | <0.001              | 0.120                | 0.120                   |
| DQD of CDBI                | 0.15(0.12, 0.16)    | 0.14(0.12, 0.16)    | 0.003(-0.002, 0.01)  | 1.99                    |
| <i>P</i>                   | <0.001              | <0.001              | 0.066                | 0.066                   |
| DAI                        | -0.15(-0.16, -0.12) | -0.15(-0.16, -0.12) | -0.001(-0.006, 0)    | 0.94                    |
| <i>P</i>                   | <0.001              | <0.001              | 0.520                | 0.520                   |
| DII                        | 0.16(0.15, 0.17)    | 0.16(0.15, 0.17)    | 0.003(-0.0001, 0.01) | 1.69                    |
| <i>P</i>                   | <0.001              | <0.001              | 0.056                | 0.056                   |

Note: ACME, average causal mediation effects; ADE, average direct effects; CDQI, Chinese Dietary Quality Index; CDBI, Chinese Dietary Balance Index; CHEI, Chinese Healthy Eating Index; DAI, Dietary antioxidant index; DII, Dietary inflammation index; DQD, dietary quality distance; HBS, high bound score; LBS, low bound score.

a. Adjusted for age, occupation, education level, household income, high-risk residential areas, smoking status, history of allergies, history of head trauma, family history of cancer, physical activity, and energy intake.



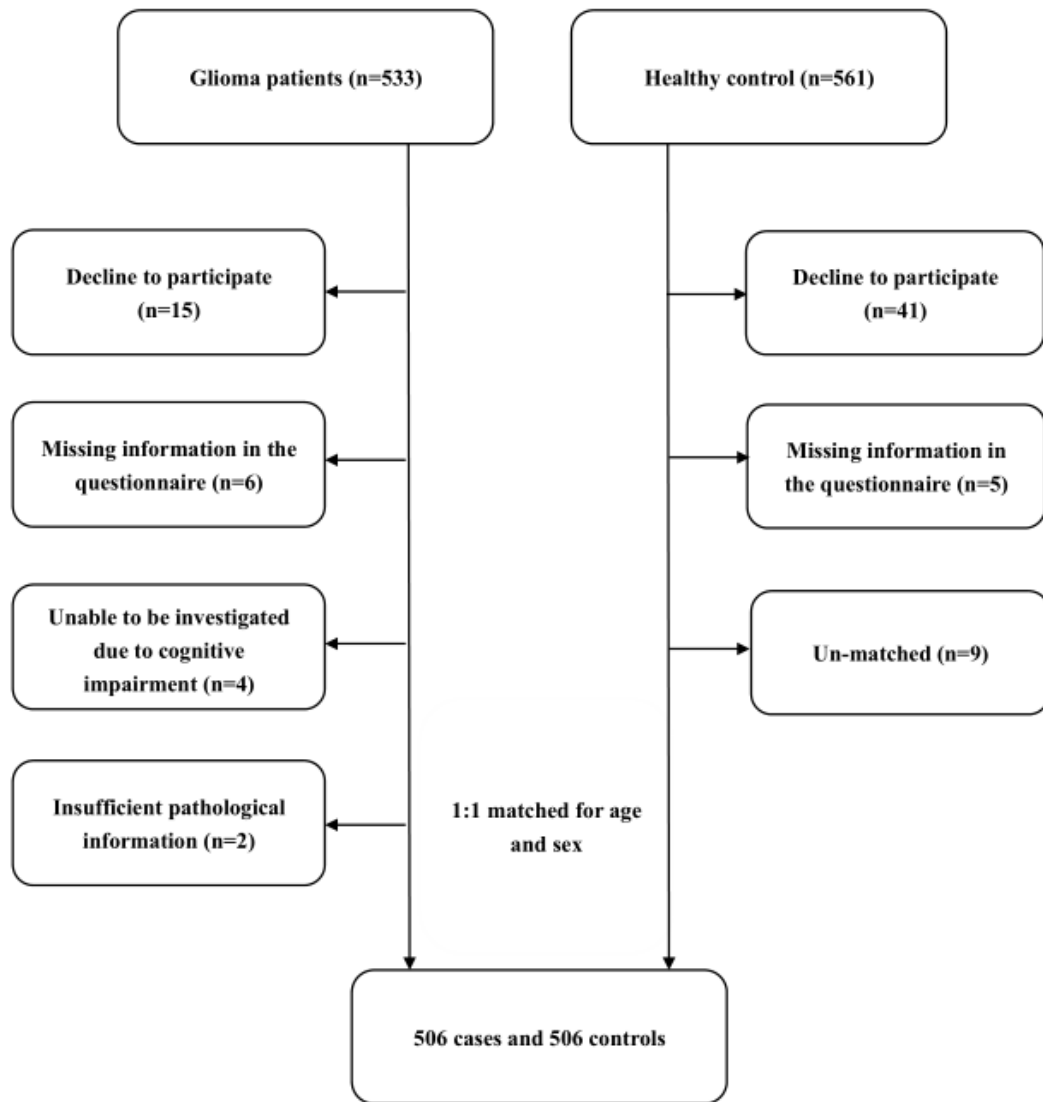

**Figure S1.** The flow chart of the case control population matching.
